# Supplementary material for: Genomics and Comparative Genomic Analyses Provide Insight into the Taxonomy and Pathogenic Potential of Novel Emmonsia Pathogens
Source: Front Cell Infect Microbiol. 2017 Mar 31;7:105. doi: 10.3389/fcimb.2017.00105 (PMC5374152; doi:10.3389/fcimb.2017.00105)
Supplement: Supplementary file 9 [file DataSheet10.xls]

## Sheet: Sheet1
Supplementary Data 10. Virulence and pathogenicity associated PHI genes unique in Emmonsia sp. CAC-2015a.
Gene ID	PHI Accession	Description	Phenotype	Pfam HMM Accession	Pfam HMM Name	Pfam type	Gene ontology (biological process)	Gene ontology (molecular function)	Gene ontology (cellular component)
rna2666	PHI:4638	Fbp1	reduced_virulence	PF00400.30	WD40	Repeat		GO:0005515,(protein binding)
rna403	PHI:2098	Calcium-transporting_ATPase_3	loss_of_pathogenicity	PF00690.24	Cation_ATPase_N	Domain	-	-	-
rna6648	PHI:1046	CTB5	reduced_virulence	-	-	-	-	-	-
rna5766	PHI:2654	DUR1,2	reduced_virulence	PF00289.20	Biotin_carb_N	Domain	-	-	-
rna1830	PHI:4893	aspB	mixed outcome	PF00735.16	Septin	Domain	GO:0008152,(metabolic process)GO:0007186,(G-protein coupled receptor signaling pathway)GO:0006576,(cellular biogenic amine metabolic process)GO:0006810,(transport)	GO:0005524,(ATP binding)GO:0004386,(helicase activity)GO:0031683,(G-protein beta/gamma-subunit complex binding)GO:0019001,(guanyl nucleotide binding)GO:0003924,(GTPase activity)GO:0005525,(GTP binding)GO:0003723,(RNA binding)GO:0016887,(ATPase activity)GO:0003724,(RNA helicase activity)GO:0016301,(kinase activity)GO:0004871,(signal transducer activity)
rna5637	PHI:5387	VdCYC8	reduced_virulence	-	-	-	-	-	-
rna6893	PHI:4658	FgHXK1	reduced_virulence	-	-	-	GO:0005975,(carbohydrate metabolic process)	GO:0005524,(ATP binding)GO:0016773,(phosphotransferase activity, alcohol group as acceptor)
rna4027	PHI:2419	CID1	reduced_virulence	-	-	-	-	-	-
rna1722	PHI:3880	MeaB	mixed outcome	-	-	-	GO:0006355,(regulation of transcription, DNA-dependent)	GO:0003700,(sequence-specific DNA binding transcription factor activity)GO:0043565,(sequence-specific DNA binding)
rna4474	PHI:2661	MedA	reduced_virulence	-	-	-	-	-	-
rna1608	PHI:2327	HOG1	reduced_virulence	-	-	-	GO:0006468,(protein phosphorylation)	GO:0005524,(ATP binding)GO:0004672,(protein kinase activity)
rna1546	PHI:4230	abcB	reduced_virulence	PF00005.25	ABC_tran	Domain		GO:0016887,(ATPase activity)GO:0005524,(ATP binding)
rna2487	PHI:320	SSN6	reduced_virulence	PF13432.4	TPR_16	Family	GO:0018342,(protein prenylation)	GO:0005515,(protein binding)GO:0008318,(protein prenyltransferase activity)GO:0042802,(identical protein binding)
rna1497	PHI:3321	Tfp1	loss_of_pathogenicity	PF02874.21	ATP-synt_ab_N	Domain	GO:0046034,(ATP metabolic process)GO:0015992,(proton transport)
rna4973	PHI:4736	MoYpt7	loss_of_pathogenicity	PF00071.20	Ras	Domain	GO:0007264,(small GTPase mediated signal transduction)	GO:0005525,(GTP binding)GO:0003924,(GTPase activity)
rna1281	PHI:1193	(Sc_Sky1)	reduced_virulence	-	-	-	-	-	-
rna5246	PHI:5353	Famfs1	reduced_virulence	PF07690.14	MFS_1	Family	GO:0006810,(transport)GO:0055085,(transmembrane transport)	GO:0022857,(transmembrane transporter activity)	GO:0016021,(integral to membrane)
rna5282	PHI:3088	CPK2	mixed outcome	PF00069.23	Pkinase	Domain	GO:0006468,(protein phosphorylation)	GO:0005524,(ATP binding)GO:0004672,(protein kinase activity)
rna3785	PHI:62	caRSR1	reduced_virulence	-	-	-	GO:0007264,(small GTPase mediated signal transduction)	GO:0005525,(GTP binding)
rna7688	PHI:1032	Bmp3	reduced_virulence	-	-	-	-	-	-
rna6672	PHI:2077	Moatg9	loss_of_pathogenicity	-	-	-	-	-	-
rna5121	PHI:100	ADR1	loss_of_pathogenicity	PF13095.4	FTA2	Family	GO:0006468,(protein phosphorylation)	GO:0016773,(phosphotransferase activity, alcohol group as acceptor)GO:0004672,(protein kinase activity)GO:0005524,(ATP binding)	GO:0016020,(membrane)
rna6785	PHI:1772	GzZC087	reduced_virulence	PF14602.4	Hexapep_2	Repeat		GO:0016407,(acetyltransferase activity)
rna1907	PHI:1172	HDF2	reduced_virulence	-	-	-	-	-	-
rna2819	PHI:2329	CTB4	reduced_virulence	PF07690.14	MFS_1	Family	GO:0055085,(transmembrane transport)		GO:0016021,(integral to membrane)
rna5508	PHI:1089	FGSG_02549	reduced_virulence	PF00300.20	His_Phos_1	Domain	-	-	-
rna1988	PHI:508	AFT1	loss_of_pathogenicity	PF13193.4	AMP-binding_C	Domain	-	-	-
rna4502	PHI:2368	bac	reduced_virulence	-	-	-	-	-	-
rna3594	PHI:508	AFT1	loss_of_pathogenicity	PF00501.26	AMP-binding	Family	GO:0008152,(metabolic process)	GO:0003824,(catalytic activity)
rna4145	PHI:4244	FgOS-2	reduced_virulence	PF00170.19	bZIP_1	Family	GO:0030001,(metal ion transport)GO:0006355,(regulation of transcription, DNA-dependent)GO:0006397,(mRNA processing)GO:0055085,(transmembrane transport)	GO:0003677,(DNA binding)GO:0003700,(sequence-specific DNA binding transcription factor activity)GO:0046873,(metal ion transmembrane transporter activity)GO:0043565,(sequence-specific DNA binding)	GO:0000445,(THO complex part of transcription export complex)GO:0005634,(nucleus)GO:0016020,(membrane)
rna2424	PHI:3848	MetR	reduced_virulence	-	-	-	-	-	-
rna4035	PHI:3270	ARSEF_2860	reduced_virulence	PF00244.18	2014-03-03	Domain	-	-	-
rna3798	PHI:26	CaMDR1	reduced_virulence	PF07690.14	MFS_1	Family	GO:0055085,(transmembrane transport)	GO:0022857,(transmembrane transporter activity)	GO:0016021,(integral to membrane)
rna3778	PHI:1193	(Sc_Sky1)	reduced_virulence	PF00069.23	Pkinase	Domain	GO:0006468,(protein phosphorylation)	GO:0004672,(protein kinase activity)GO:0005524,(ATP binding)
rna6704	PHI:2376	DEP2	mixed outcome	PF01494.17	FAD_binding_3	Family	GO:0055114,(oxidation-reduction process)	GO:0071949,(FAD binding)GO:0016491,(oxidoreductase activity)
rna2913	PHI:61	BGL2	reduced_virulence	-	-	-	-	-	-
rna3126	PHI:2034	MFP1	reduced_virulence	PF00106.23	adh_short	Domain	GO:0055114,(oxidation-reduction process)GO:0009396,(folic acid-containing compound biosynthetic process)	GO:0004488,(methylenetetrahydrofolate dehydrogenase (NADP+) activity)GO:0003824,(catalytic activity)
rna5647	PHI:819	MGG_07061	reduced_virulence	-	-	-	-	-	-
rna5124	PHI:423	VAD1	reduced_virulence	PF00271.29	Helicase_C	Family	GO:0006418,(tRNA aminoacylation for protein translation)	GO:0005524,(ATP binding)GO:0004812,(aminoacyl-tRNA ligase activity)GO:0003676,(nucleic acid binding)GO:0000166,(nucleotide binding)
rna3334	PHI:5028	gta1	mixed outcome	-	-	-	-	-	-
rna4608	PHI:2172	TPS1	loss_of_pathogenicity	PF00982.19	Glyco_transf_20	Family	GO:0005992,(trehalose biosynthetic process)	GO:0003824,(catalytic activity)
rna4728	PHI:3014	MoAND1	reduced_virulence	-	-	-	GO:0048193,(Golgi vesicle transport)GO:0071973,(bacterial-type flagellar cell motility)	GO:0005198,(structural molecule activity)	GO:0016020,(membrane)GO:0031083,(BLOC-1 complex)GO:0030133,(transport vesicle)
rna4630	PHI:61	BGL2	reduced_virulence	-	-	-	GO:0005975,(carbohydrate metabolic process)	GO:0004553,(hydrolase activity, hydrolyzing O-glycosyl compounds)
rna3438	PHI:5040	BFA1	reduced_virulence	-	-	-	-	-	-
rna3497	PHI:423	VAD1	reduced_virulence	PF00270.27	DEAD	Domain	GO:0019079,(viral genome replication)	GO:0003676,(nucleic acid binding)GO:0005524,(ATP binding)GO:0016787,(hydrolase activity)GO:0003677,(DNA binding)GO:0008026,(ATP-dependent helicase activity)
rna5615	PHI:2638	Ilv3A	reduced_virulence	PF00920.19	ILVD_EDD	Family	GO:0008152,(metabolic process)	GO:0003824,(catalytic activity)
rna2847	PHI:445	NOS1	reduced_virulence	PF00346.17	Complex1_49kDa	Family	GO:0055114,(oxidation-reduction process)	GO:0051287,(NAD binding)GO:0016651,(oxidoreductase activity, acting on NADH or NADPH)GO:0048038,(quinone binding)
rna2723	PHI:1772	GzZC087	reduced_virulence	-	-	-	GO:0006355,(regulation of transcription, DNA-dependent)	GO:0008270,(zinc ion binding)GO:0000981,(sequence-specific DNA binding RNA polymerase II transcription factor activity)	GO:0005634,(nucleus)
rna6201	PHI:2911	Ss-pth2	reduced_virulence	PF00755.18	Carn_acyltransf	Family		GO:0016746,(transferase activity, transferring acyl groups)
rna6352	PHI:3887	UBL1	reduced_virulence	-	-	-	-	-	-
rna6827	PHI:2178	MoSFl1	reduced_virulence	PF00447.15	HSF_DNA-bind	Domain	GO:0006355,(regulation of transcription, DNA-dependent)	GO:0043565,(sequence-specific DNA binding)GO:0003700,(sequence-specific DNA binding transcription factor activity)	GO:0005634,(nucleus)
rna2837	PHI:3323	sskB	loss_of_pathogenicity	PF00069.23	Pkinase	Domain	GO:0006468,(protein phosphorylation)	GO:0004672,(protein kinase activity)GO:0016773,(phosphotransferase activity, alcohol group as acceptor)GO:0005524,(ATP binding)	GO:0016020,(membrane)
rna4869	PHI:807	MGG_06951	reduced_virulence	PF01435.16	Peptidase_M48	Domain	GO:0006508,(proteolysis)	GO:0004222,(metalloendopeptidase activity)
rna6501	PHI:2921	FET3-2	reduced_virulence	PF07731.12	Cu-oxidase_2	Domain	GO:0055114,(oxidation-reduction process)	GO:0005507,(copper ion binding)GO:0016491,(oxidoreductase activity)
rna4300	PHI:2625	purA	reduced_virulence	PF00709.19	Adenylsucc_synt	Domain	GO:0006164,(purine nucleotide biosynthetic process)	GO:0004019,(adenylosuccinate synthase activity)GO:0005525,(GTP binding)
rna2677	PHI:784	MGG_00056	reduced_virulence	PF00106.23	adh_short	Domain	GO:0055114,(oxidation-reduction process)GO:0006813,(potassium ion transport)GO:0006631,(fatty acid metabolic process)	GO:0003857,(3-hydroxyacyl-CoA dehydrogenase activity)GO:0016491,(oxidoreductase activity)
rna837	PHI:1070	MIG1	loss_of_pathogenicity	PF00319.16	SRF-TF	Domain		GO:0046983,(protein dimerization activity)GO:0003677,(DNA binding)
rna7027	PHI:2570	CYB2	reduced_virulence	PF01070.16	FMN_dh	Domain	GO:0006537,(glutamate biosynthetic process)GO:0000105,(histidine biosynthetic process)GO:0055114,(oxidation-reduction process)	GO:0003824,(catalytic activity)GO:0016627,(oxidoreductase activity, acting on the CH-CH group of donors)GO:0016638,(oxidoreductase activity, acting on the CH-NH2 group of donors)GO:0016491,(oxidoreductase activity)GO:0015930,(glutamate synthase activity)GO:0018580,(nitronate monooxygenase activity)	GO:0005737,(cytoplasm)
rna5771	PHI:424	PCK1	reduced_virulence	PF01293.18	PEPCK_ATP	Family	GO:0006094,(gluconeogenesis)	GO:0005524,(ATP binding)GO:0004612,(phosphoenolpyruvate carboxykinase (ATP) activity)
rna6771	PHI:510	CaNAG3	reduced_virulence	-	-	-	GO:0055085,(transmembrane transport)		GO:0016021,(integral to membrane)
rna684	PHI:4606	PiGPB1	reduced_virulence	PF00400.30	WD40	Repeat		GO:0005515,(protein binding)
rna1752	PHI:5394	mas5	loss_of_pathogenicity	PF00226.29	DnaJ	Domain	GO:0042742,(defense response to bacterium)
rna6089	PHI:2821	SNF2	reduced_virulence	PF00271.29	Helicase_C	Family		GO:0005524,(ATP binding)
rna2386	PHI:3893	FgEBR1	reduced_virulence	-	-	-	GO:0006397,(mRNA processing)		GO:0005634,(nucleus)
rna6985	PHI:6074	Tpd3	reduced_virulence	PF13646.4	HEAT_2	Family		GO:0005515,(protein binding)
rna381	PHI:1185	(Sc_Swe1)	reduced_virulence	-	-	-	GO:0006468,(protein phosphorylation)	GO:0005524,(ATP binding)GO:0004672,(protein kinase activity)GO:0016773,(phosphotransferase activity, alcohol group as acceptor)	GO:0016020,(membrane)
rna4998	PHI:1933	GzZC248	reduced_virulence	PF11951.6	Fungal_trans_2	Family	GO:0006355,(regulation of transcription, DNA-dependent)	GO:0008270,(zinc ion binding)GO:0000981,(sequence-specific DNA binding RNA polymerase II transcription factor activity)	GO:0005634,(nucleus)
rna3648	PHI:17	ACP	reduced_virulence	PF00026.21	Asp	Family	-	-	-
rna6	PHI:1046	CTB5	reduced_virulence	PF01565.21	FAD_binding_4	Domain	GO:0055114,(oxidation-reduction process)	GO:0050660,(flavin adenine dinucleotide binding)GO:0016491,(oxidoreductase activity)
rna5371	PHI:2124	MGSTE7p	loss_of_pathogenicity	-	-	-	GO:0006468,(protein phosphorylation)	GO:0004672,(protein kinase activity)GO:0005524,(ATP binding)
rna397	PHI:3054	FvHAP5	reduced_virulence	PF00808.21	CBFD_NFYB_HMF	Domain	GO:0006281,(DNA repair)GO:0051382,(kinetochore assembly)	GO:0003677,(DNA binding)
rna1687	PHI:434	GEL2	reduced_virulence	PF03198.12	Glyco_hydro_72	Domain	-	-	-
rna3462	PHI:2840	CnSEC14-1	reduced_virulence	PF00650.18	CRAL_TRIO	Domain	-	-	-
rna4369	PHI:3914	Sdh1	reduced_virulence	PF00171.20	Aldedh	Family	GO:0008152,(metabolic process)GO:0055114,(oxidation-reduction process)	GO:0016491,(oxidoreductase activity)
rna4679	PHI:2058	LHS1	reduced_virulence	PF00012.18	HSP70	Family	GO:0000902,(cell morphogenesis)
rna4424	PHI:2386	ACL1	loss_of_pathogenicity	PF02629.17	CoA_binding	Domain		GO:0048037,(cofactor binding)
rna8018	PHI:454	PMT2	reduced_virulence	-	-	-	GO:0006493,(protein O-linked glycosylation)	GO:0000030,(mannosyltransferase activity)	GO:0016020,(membrane)
rna4423	PHI:2267	Mls1	loss_of_pathogenicity	PF01274.20	Malate_synthase	Family	GO:0006097,(glyoxylate cycle)	GO:0004474,(malate synthase activity)
rna2493	PHI:5272	fabG2	reduced_virulence	PF13561.4	adh_short_C2	Domain	-	-	-
rna7183	PHI:438	BcBOT1_(CND5)	reduced_virulence	PF00067.20	p450	Domain	GO:0055114,(oxidation-reduction process)	GO:0020037,(heme binding)GO:0005506,(iron ion binding)GO:0016705,(oxidoreductase activity, acting on paired donors, with incorporation or reduction of molecular oxygen)
rna2325	PHI:4230	abcB	reduced_virulence	PF00005.25	ABC_tran	Domain		GO:0016887,(ATPase activity)GO:0005524,(ATP binding)
rna3782	PHI:2084	Moatg18	reduced_virulence	-	-	-	-	-	-
rna3352	PHI:504	LEU2	reduced_virulence	PF00180.18	Iso_dh	Domain	GO:0055114,(oxidation-reduction process)	GO:0016616,(oxidoreductase activity, acting on the CH-OH group of donors, NAD or NADP as acceptor)
rna5452	PHI:5365	SomA	reduced_virulence	-	-	-	-	-	-
rna4844	PHI:3862	FgSNF1	reduced_virulence	-	-	-	-	-	-
rna4815	PHI:3101	BCKDH	reduced_virulence	PF00676.18	E1_dh	Family	GO:0008152,(metabolic process)	GO:0016624,(oxidoreductase activity, acting on the aldehyde or oxo group of donors, disulfide as acceptor)
rna8622	PHI:419	CSH1	reduced_virulence	-	-	-	-	-	-
rna6416	PHI:510	CaNAG3	reduced_virulence	PF07690.14	MFS_1	Family	GO:0055085,(transmembrane transport)	GO:0022857,(transmembrane transporter activity)	GO:0016021,(integral to membrane)
rna4599	PHI:2840	CnSEC14-1	reduced_virulence	PF03765.13	CRAL_TRIO_N	Domain	-	-	-
rna7648	PHI:144	CHT42	reduced_virulence	PF00704.26	Glyco_hydro_18	Domain	GO:0005975,(carbohydrate metabolic process)	GO:0004553,(hydrolase activity, hydrolyzing O-glycosyl compounds)
rna8650	PHI:1051	CTB3	reduced_virulence	PF00891.16	Methyltransf_2	Family		GO:0008171,(O-methyltransferase activity)
rna1876	PHI:3822	GIT3	reduced_virulence	-	-	-	GO:0055085,(transmembrane transport)	GO:0022857,(transmembrane transporter activity)	GO:0016021,(integral to membrane)
rna1807	PHI:5232	MoARG1	loss_of_pathogenicity	PF00764.17	Arginosuc_synth	Family	GO:0006526,(arginine biosynthetic process)	GO:0004055,(argininosuccinate synthase activity)GO:0005524,(ATP binding)
rna6265	PHI:4878	Ppg1	reduced_virulence	PF00149.26	Metallophos	Domain		GO:0016787,(hydrolase activity)
rna7259	PHI:4692	pbpX	reduced_virulence	PF00144.22	Beta-lactamase	Domain	-	-	-
rna4104	PHI:441	BTP1	mixed outcome	-	-	-	-	-	-
rna5966	PHI:210	CAP1	loss_of_pathogenicity	PF01213.17	CAP_N	Family	GO:0007010,(cytoskeleton organization)	GO:0003779,(actin binding)
rna7089	PHI:5554	LmABCB3	reduced_virulence	PF00005.25	ABC_tran	Domain		GO:0016301,(kinase activity)GO:0016887,(ATPase activity)GO:0003924,(GTPase activity)GO:0005525,(GTP binding)GO:0005524,(ATP binding)
